# Supplementary material
Source: publisher site journal article supplement (https://www.spandidos-publications.com/3289/downloadSupplementary)

Figure S1. Effects of sterol derivatives in cationic liposomes on knockdown of Tie2 mRNA expression in the lungs of mice systemically injected with siRNA lipoplexes carrying Tie2 siRNA. Expression of lung Tie2 mRNA was quantified relative to that of PTEN mRNA at 48 h after systemic injection of siRNA lipoplexes carrying 20  $\mu$ g of Cont siRNA or Tie2 siRNA. Tie2 mRNA expression (%) was calculated relative to that of lungs of mice treated with Cont siRNA. Values are shown as means  $\pm$  standard deviation (n=3-4). \*\*P<0.01 vs. Cont siRNA. LP, liposome; Chol, cholesterol; Stig, stigmasterol; Ergo, ergosterol; Sito,  $\beta$ -sitosterol; DDAB, dimethyldioctadecylammonium bromide; DOTAP, 1,2-dioleoyl-3-trimethylammonium-propane methyl sulfate salt; si, short interfering; Tie2, angiopoietin-1 receptor; lipoplex, cationic liposome complexes.

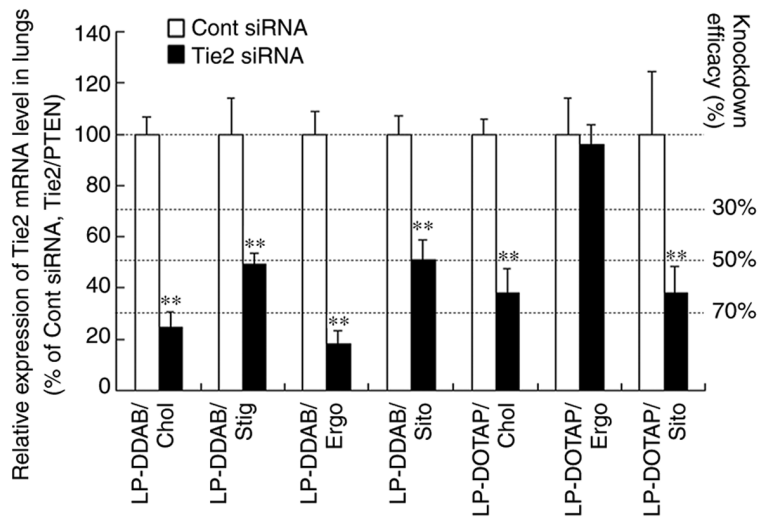

Supplement: Supplementary file 1 [file downloadSupplementary]
